# Supplementary material for: A glutathione-activatable photodynamic and fluorescent imaging monochromatic photosensitizer
Source: Royal Society of Chemistry journal article supplement (doi:10.1039/c7tb00724h), 2017-01-01
Supplement: c7tb00724h1.pdf [file c7tb00724h1.pdf]

## Supplementary Information

### **A glutathione-activatable photodynamic and fluorescent imaging monochromatic photosensitizer**

Zhensheng Li,<sup>a,b</sup> Yang Liu,<sup>b,c</sup> Li Chen,<sup>c</sup> Xiuli Hu<sup>b</sup> and Zhigang Xie<sup>\*b</sup>

<sup>a</sup>School of Chemistry and Chemical Engineering, Xuchang University, 88 Bayi Street, Xuchang 461000, P. R. China

<sup>b</sup>State Key Laboratory of Polymer Physics and Chemistry, Changchun Institute of Applied Chemistry, Chinese Academy of Sciences, 5625 Renmin Street, Changchun 130022, P. R. China

<sup>c</sup>Department of Chemistry, Northeast Normal University, 5268 Renmin Street, Changchun 130024, P. R. China

\* corresponding authors: [xiez@ciac.ac.cn](mailto:xiez@ciac.ac.cn)

#### **Contents:**

- 1) Figure S1: <sup>1</sup>H NMR spectra of **1** in CDCl<sub>3</sub>.
- 2) Figure S2: <sup>1</sup>H NMR spectra of **2** in CDCl<sub>3</sub>.
- 3) Figure S3: <sup>1</sup>H NMR spectra of **3** in CDCl<sub>3</sub>.
- 4) Figure S4: <sup>1</sup>H NMR spectra of **4** in CDCl<sub>3</sub>.
- 5) Figure S5: <sup>1</sup>H NMR spectra of **NO<sub>2</sub>-BDP** in CDCl<sub>3</sub>.
- 6) Figure S6: ESI-MS spectrum of **NO<sub>2</sub>-BDP**.
- 7) Stacked partial <sup>1</sup>H NMR spectra of **NO<sub>2</sub>-BDP** (B) and conjugate addition with GSH (A) in d<sup>6</sup>-DMSO.
- 8) ESI-MS spectrum of **NO<sub>2</sub>-BDP** after the GSH treatment.
- 9) Figure S9: UV-vis absorption and fluorescence spectra of **NO<sub>2</sub>-BDP** (10 μM) in various solvents.
- 10) Figure S10: Time-dependent PL spectra of **NO<sub>2</sub>-BDP** (10 μM) upon incubation with GSH (2 mM).

11) Figure S11: Flow cytometric analyses of the probe **NO<sub>2</sub>-BDP** (10 μM) incubated HeLa cells for pretreated with NMM (1 mM) or GSH (1 mM).

12) Figure S10: Bright-field images of HepG2 cells with different treatments (a); Cell viability of HepG2 Cells incubated with **NO<sub>2</sub>-BDP** and NMM without (b) or with irradiation (c).

13) Figure S11: The dark cytotoxicity of the sensitizers **NO<sub>2</sub>-BDP** by the MTT assay.

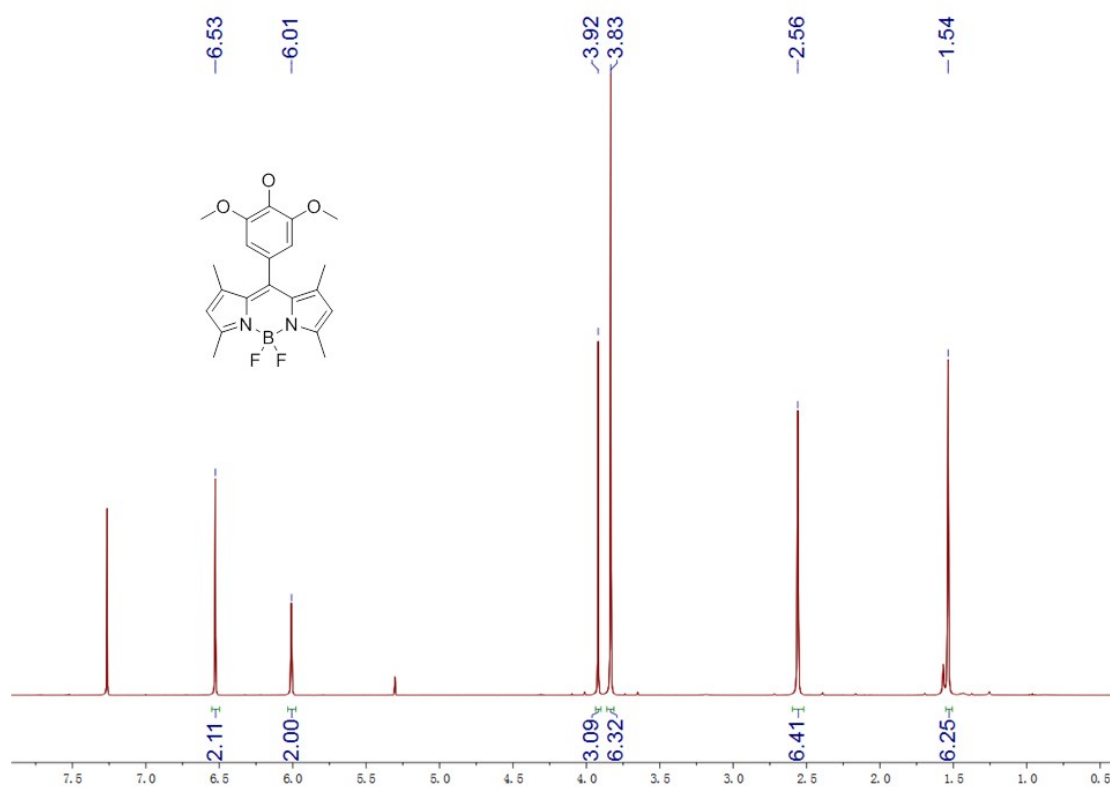

**Figure S1.** <sup>1</sup>H NMR spectra of **1** in CDCl<sub>3</sub>.

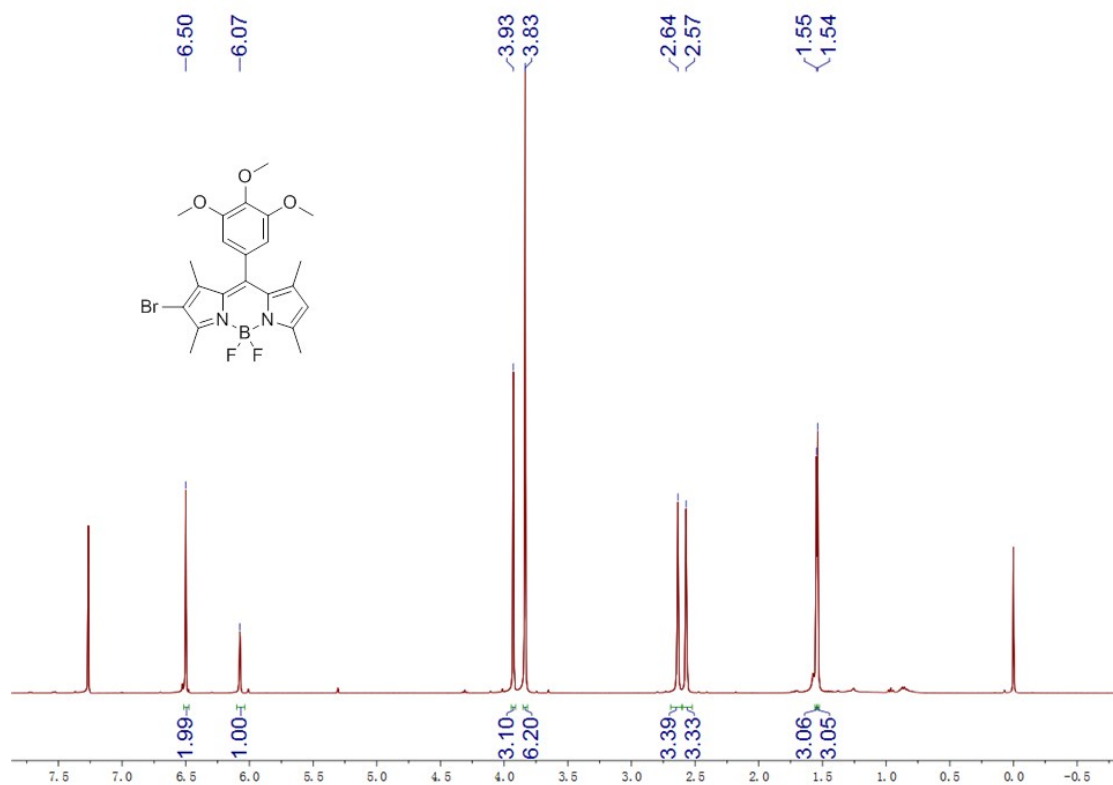

**Figure S2.**  $^1\text{H}$  NMR spectra of **2** in  $\text{CDCl}_3$ .

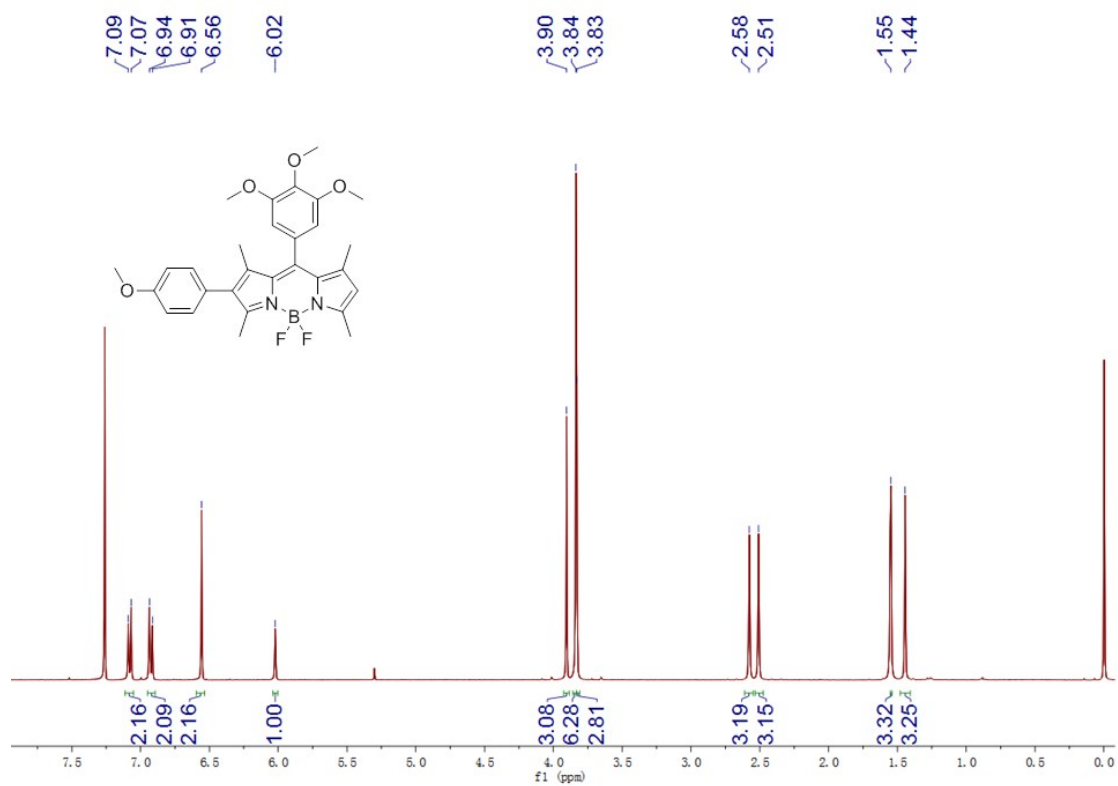

**Figure S3.**  $^1\text{H}$  NMR spectra of **3** in  $\text{CDCl}_3$ .

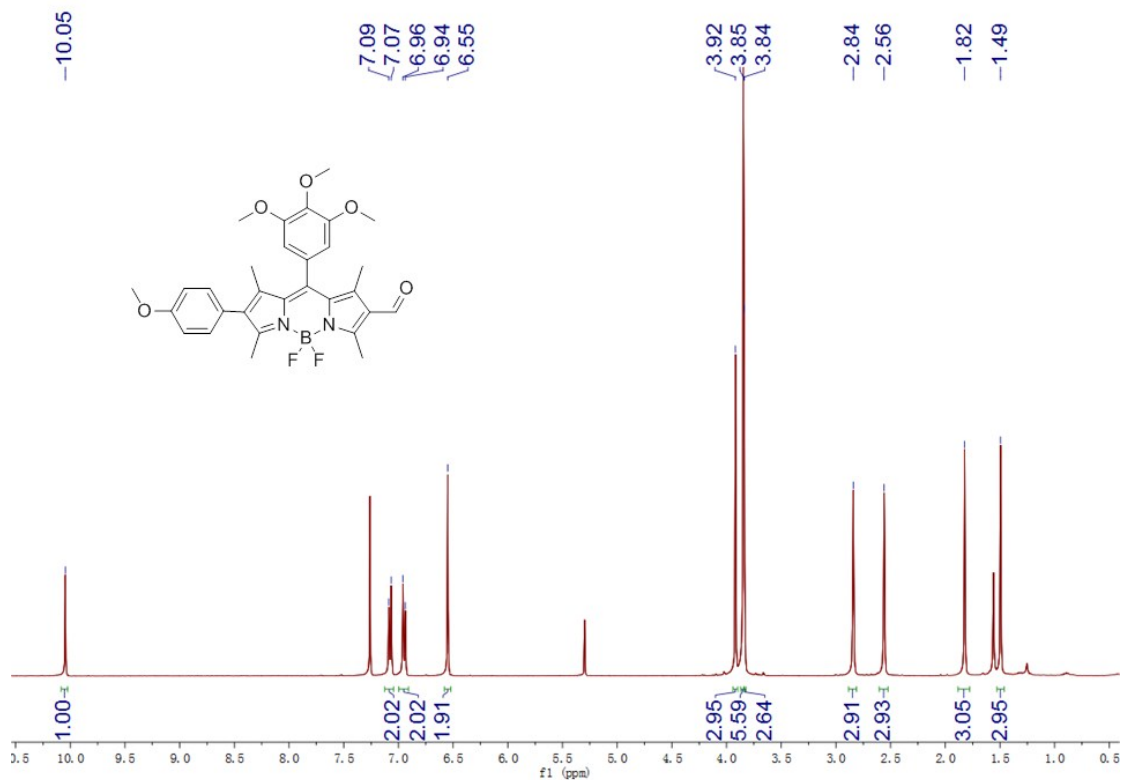

**Figure S4.**  $^1\text{H}$  NMR spectra of **4** in  $\text{CDCl}_3$ .

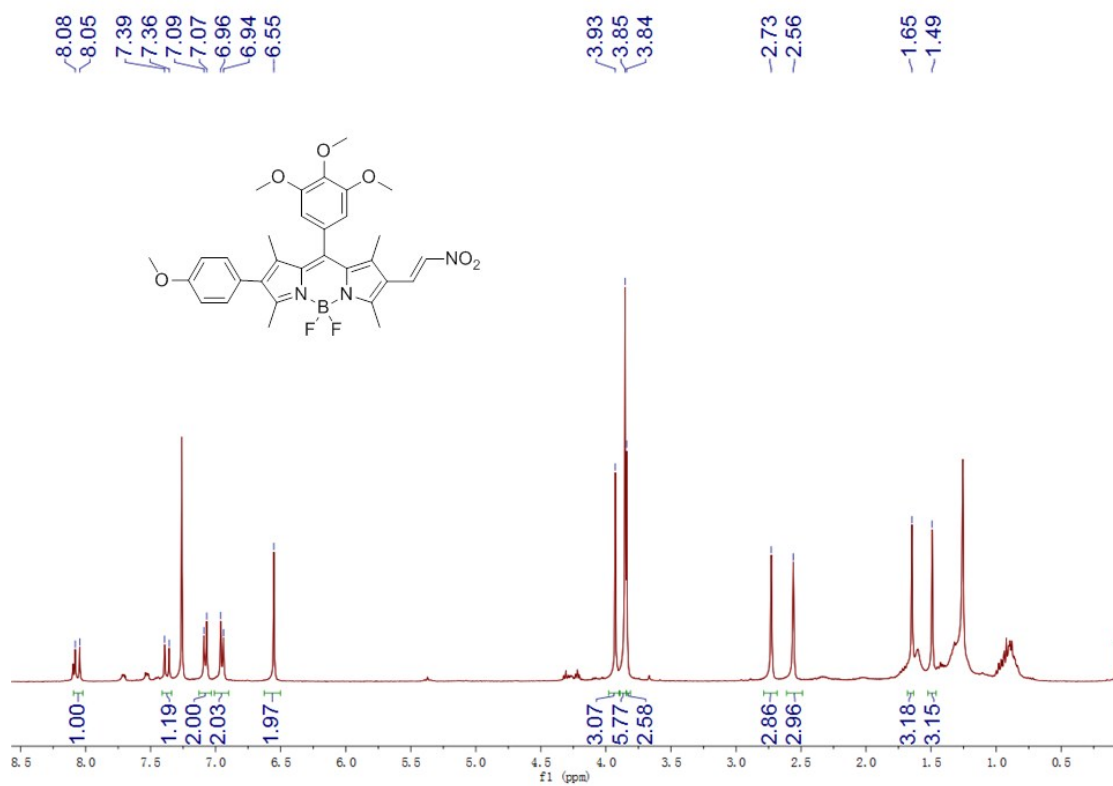

**Figure S5.**  $^1\text{H}$  NMR spectra of **NO<sub>2</sub>-BDP** in  $\text{CDCl}_3$ .

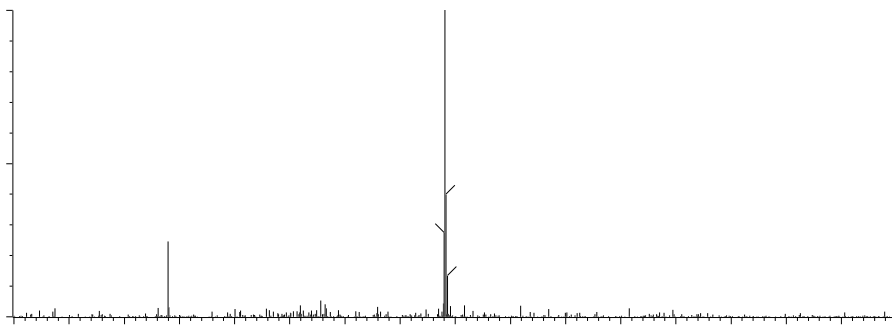

Figure S6. ESI-MS spectrum of **NO<sub>2</sub>-BDP**.

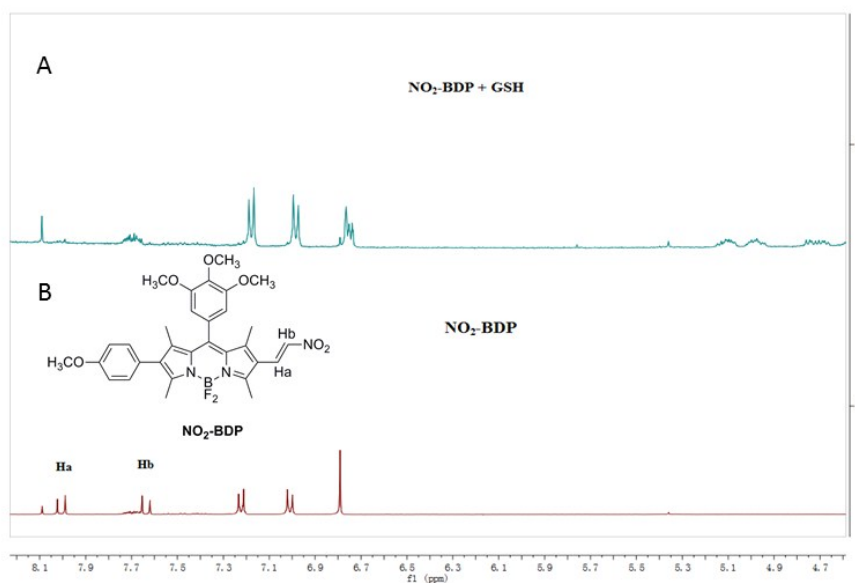

Figure S7. Stacked partial <sup>1</sup>H NMR spectra of **NO<sub>2</sub>-BDP** (B) and conjugate addition with GSH (A) in d<sup>6</sup>-DMSO.

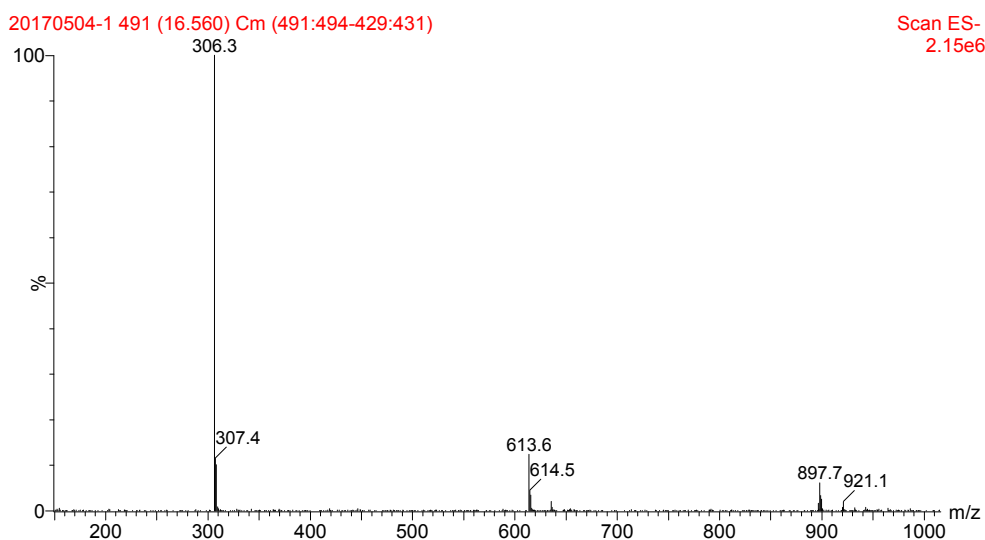

Figure S8. ESI-MS spectrum of **NO<sub>2</sub>-BDP** after the GSH treatment.

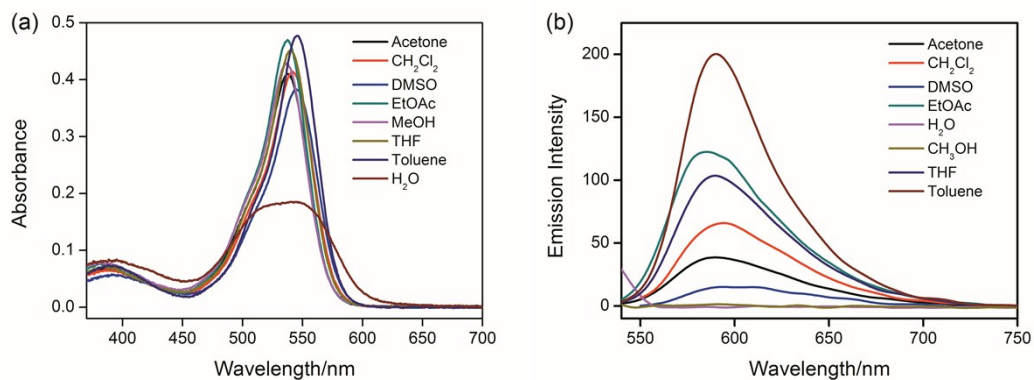

**Figure S9.** UV-vis absorption and fluorescence spectra of  $\text{NO}_2\text{-BDP}$  (10  $\mu\text{M}$ ) in various solvents.

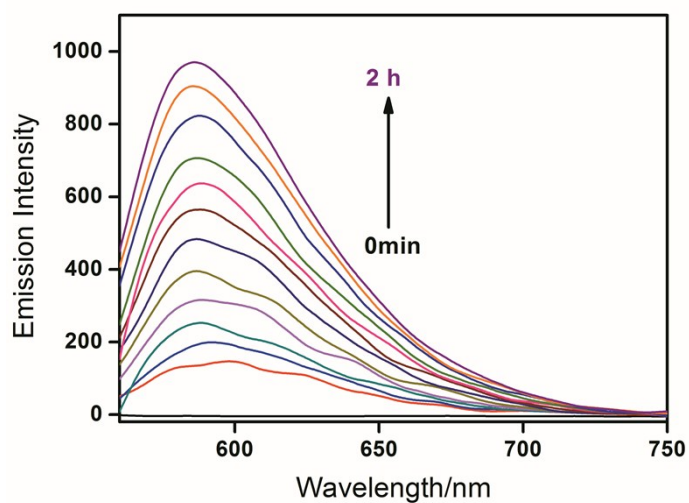

**Figure S10.** Time-dependent PL spectra of  $\text{NO}_2\text{-BDP}$  (10  $\mu\text{M}$ ) upon incubation with GSH (2 mM).

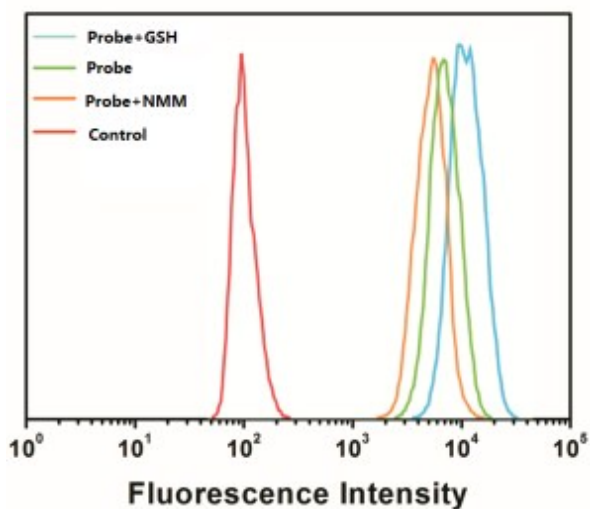

**Figure S11.** Flow cytometric analyses of the probe  $\text{NO}_2\text{-BDP}$  (10  $\mu\text{M}$ ) incubated HeLa cells for pretreated with NMM (1 mM) or GSH (1 mM).

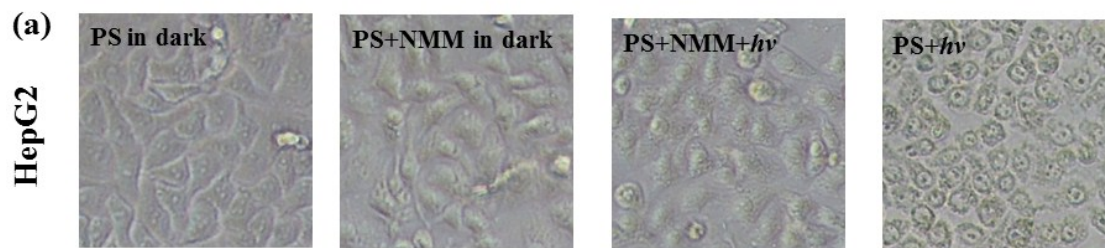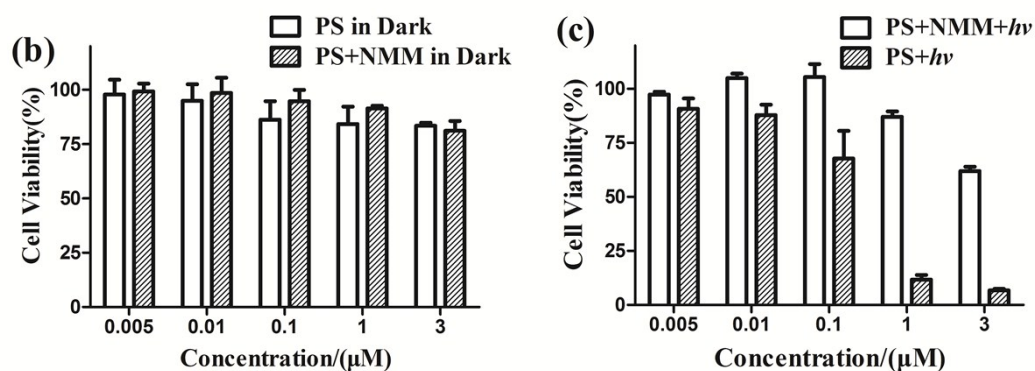

**Figure S12.** Bright-field images of HepG2 cells with different treatments (a); Cell viability of HepG2 Cells incubated with  $\text{NO}_2\text{-BDP}$  and NMM without (b) or with irradiation (c).

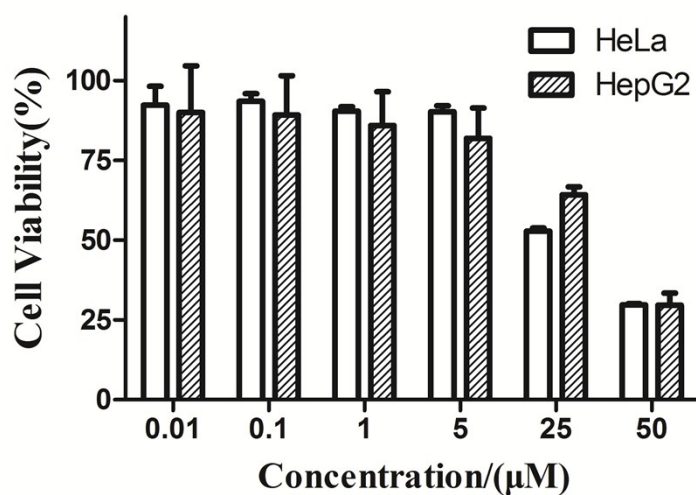

**Figure S13.** The dark cytotoxicity of the sensitizers  $\text{NO}_2\text{-BDP}$  by the MTT assay.
